# Supplementary material for: Natural deep eutectic solvents as tailored and sustainable media for the extraction of five compounds from compound liquorice tablets and their comparison with conventional organic solvents
Source: Royal Society of Chemistry journal article supplement (doi:10.1039/d1ra06338c), 2021-01-01
Supplement: d1ra06338c1.pdf [file d1ra06338c1.pdf]

### Supplementary Information

Table S1. Calibration curve equations and linearity ranges of the standard solutions.

| Analyte           | Calibration curve      | R <sup>2</sup> | Linear range (µg/mL) |
|-------------------|------------------------|----------------|----------------------|
| Liquiritin        | $Y = 352.67X - 0.5299$ | 0.9994         | 1.48-148.05          |
| Isoliquiritin     | $Y = 589.13X - 0.5255$ | 0.9994         | 0.86-85.92           |
| Liquiritigenin    | $Y = 715.37X - 0.2724$ | 0.9992         | 0.36-36.00           |
| Glycyrrhizic Acid | $Y = 715.37X - 0.2724$ | 0.9994         | 17.50-1750.18        |
| Isoliquiritigenin | $Y = 406.91X - 0.2060$ | 0.9991         | 0.38-37.80           |
